# Supplementary material for: Tunable emission in lanthanide coordination polymer gels based on a rationally designed blue emissive gelator
Source: Royal Society of Chemistry journal article supplement (doi:10.1039/c5cc02709h), 2015-01-01
Supplement: c5cc02709h1.pdf [file c5cc02709h1.pdf]

## Supporting Information

### **Tunable emission in lanthanide coordination polymer gels based on a rationally designed blue emissive gelator**

Papri Sutar, Venkata M. Suresh and Tapas Kumar Maji\*

*Molecular Materials Laboratory, Chemistry and Physics of Materials Unit, Jawaharlal Nehru Centre for Advanced Scientific Research, Jakkur, Bangalore 560 064, India*

#### **1. Experimental Section.**

**1.1 Materials and Methods:** 9, 10-dibromoanthracene, 4-carboxyphenyl boronic acid, 1,3-diaminopropane, 4'-chloro-2,2':6',2''-terpyridine, trichloroisocyanuric acid (TCIC) and triphenylphosphine (PPh<sub>3</sub>) were purchased from Sigma-Aldrich chemical Co. Ltd. Solvents were pre-dried using standard procedures before using. For UV-Vis experiments, spectroscopic grade solvents were purchased from Spectrochem. <sup>1</sup>H NMR is recorded on a Bruker AV-400 spectrometer with chemical shifts recorded as ppm and all spectra were calibrated against TMS. UV-Vis spectra were recorded in a Perkin-Elmer lamda 900 spectrometer. Fluorescence studies were accomplished using Perkin Elmer Ls 55 Lumeniscence spectrometer. Infrared spectral studies were carried out by making samples with KBr pellets using Bruker FT-IR spectrometer. Powder X-ray diffraction studies were recorded on a Bruker D8 discover instrument using Cu-K $\alpha$  radiation. Elemental analyses were carried out using a Thermo Scientific Flash 2000 CHN analyzer. Morphology studies were carried out using Lica-S440I field emission scanning electron microscopy (FESEM) by placing samples on silicon wafer under vacuum with accelerating voltage of 10 kV. Transmission electron microscopy (TEM) was performed using JOEL JEM-3010 with

accelerating voltage of 300 kV. For this analysis the xerogel was dispersed in ethanol and then drop casted on a carbon coated copper grid.

**1.2 Synthesis of 9,10-(4-carboxyphenyl)anthracene :** 9,10-(4-carboxyphenyl)anthracene was synthesized by slightly modifying the reported procedure.<sup>1</sup> 9,10-dibromoanthracene (740 mg, 2.2 mmol), methyl-4-carboxyphenyl boronic acid (1 g, 5.5 mmol), CsF (4 g, 2.7 mmol) and Pd(PPh<sub>3</sub>)<sub>4</sub> (200 mg, 0.17 mmol) were suspended in 1,2-dimethoxyethane (30 ml). The reaction mixture was refluxed at 100 °C for 48 hours maintaining the inert condition. After that, the reaction mixture was cooled to room temperature and 100 ml H<sub>2</sub>O was added to dissolve the excess CsF, and the organic product was extracted by CHCl<sub>3</sub>. Pure 9,10-(methyl-4-carboxyphenyl)anthracene was obtained after running the crude product through column using CHCl<sub>3</sub>/hexane as eluent. Yield: 93 %. The as-prepared 9,10-(methyl-4-carboxyphenyl)anthracene (563 mg, 1.26 mmol) was suspended in MeOH (30 ml). KOH (425 mg, 7.56 mmol) was added and refluxed for 6 hours at 60 °C. After cooling to room temperature 6 N HCl was added drop-wise into the reaction mixture. The white precipitate formed was filtered and wash repeatedly by cold water and dried under vacuum. Yield: 96 %. <sup>1</sup>H-NMR (400 MHz, CDCl<sub>3</sub>) δ: 8.23 (d, 4H, ArH), 7.62 (m, 4H, ArH), 7.55 (m, 4H, ArH), 7.46 (m, 4H, ArH), 13.11 (br, 2H, COOH). Selected FTIR data (KBr, cm<sup>-1</sup>): 2986 (b), 2667 (m), 2547 (m), 1688 (s, sh), 1608 (s), 1425 (m), 1291 (m), 769 (m). CHN analysis for C<sub>28</sub>H<sub>18</sub>O<sub>4</sub>: Calc. C, 80.38; H, 4.30%. Expt.: C, 80.85; H, 4.12%.

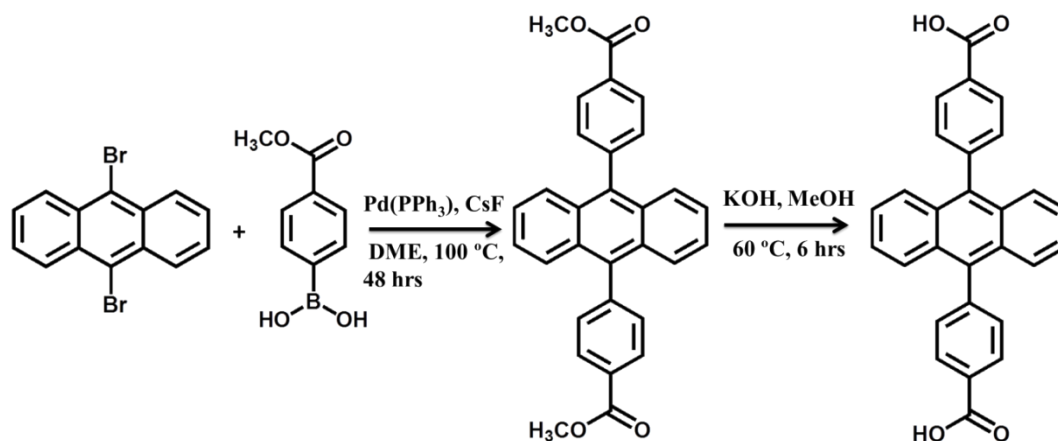

**1.3 Synthesis of 2,2';6',2''-terpyridin-4'-yl-propane-1,3-diamine:** 2,2';6',2''-terpyridin-4'-yl-propane-1,3-diamine was prepared by using reported literature procedure.<sup>2</sup> 4'-chloro-2,2':6',2''-terpyridine, (300 mg, 1.12 mmol) was suspended in 1,3-diamino propane (2.16 ml). The reaction mixture was then refluxed at 120 °C for overnight. After cooling to room temperature, H<sub>2</sub>O (25 mL) was added. The white precipitate formed was filtered and further washed with H<sub>2</sub>O. The solid was dissolved in dichloromethane and extracted twice with H<sub>2</sub>O. The organic layers were combined and dried over Na<sub>2</sub>SO<sub>4</sub>, filtered and the solvent was removed under reduced pressure to yield a white solid product. Yield: 82%. <sup>1</sup>H-NMR (400 MHz, CDCl<sub>3</sub>)  $\delta$ : 8.53 (d, 2H, ArH), 8.52 (d, 2H, ArH), 7.76 (t, 2H, ArH), 7.60 (s, 2H, ArH), 7.25 (t, 2H, ArH), 5.16 (t, 1H, NH), 3.41 (m, 2H, NHCH<sub>2</sub>), 2.84 (m, 2H, CH<sub>2</sub>), 1.77 (m, 2H, NH<sub>2</sub>CH<sub>2</sub>). Selected FTIR data (KBr, cm<sup>-1</sup>): 3340 (b), 2965 (m), 1610-1560 (s), 1464 (m), 1402 (m), 1261 (m), 1094-981 (s), 791 (s). CHN analysis for C<sub>18</sub>H<sub>19</sub>N<sub>5</sub> Calc.: C, 70.81; H, 6.22; N, 22.95%. Expt.: C, 70.90; H, 6.11; N, 22.83%.

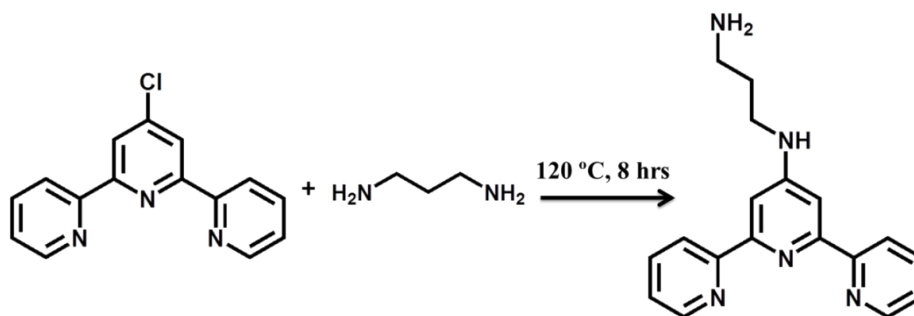

**1.4 Synthesis of 9,10-(4-carboxyphenyl)anthracene-di-{[3-([2,2';6',2'']-terpyridin-4'-ylamino)-propyl]-amide} (L) :** 9,10-(4-carboxyphenyl)anthracene (200 mg, 0.478 mmol) was dissolved in anhydrous THF (20 mL). TCIC (244 mg, 1.05 mmol) and PPh<sub>3</sub> (275 mg, 1.05 mmol) were added into the reaction mixture and stirred at 0 °C for 40 min under inert condition. 2,2';6',2''-terpyridin-4'-yl-propane-1,3-diamine (320 mg, 1.05 mmol) was dissolved in anhydrous THF and Et<sub>3</sub>N (293  $\mu$ l, 2.1 mmol) was added into it. This reaction mixture was drop-wise added into 9,10-(4-carboxyphenyl)anthracene/ TCIC/ PPh<sub>3</sub> solution at 0 °C and stirred for 45 minutes. After that the reaction mixture was stirred at room temperature for 3 hrs. Precipitates were collected by filtration and washed several times with CHCl<sub>3</sub> and dried under reduced pressure. Yield: 88%. <sup>1</sup>H-NMR (400 MHz, CDCl<sub>3</sub>)  $\delta$ : 8.87 (s, 3H, ArH), 8.74 (d, 1H, ArH), 8.30 (m, 1H, ArH), 8.26 (m, 3H, ArH), 8.15 (m, 5H, ArH), 7.79 (s, 3H, ArH), 7.69 (m, 2H, ArH), 2.98 (m, 4H, NHCH<sub>2</sub>), 1.99 (m, 2H, CH<sub>2</sub>). Selected FTIR data (KBr, cm<sup>-1</sup>): 3436 (m), 3239 (m), 2980- 2888 (m), 2740 (m), 2674 (s), 2493 (m), 1645 (s), 1583 (m), 1472 (m), 1396 (s), 1166 (s), 1135(s), 790 (s).CHN analysis for C<sub>64</sub>H<sub>52</sub>N<sub>10</sub>O<sub>2</sub> Calc.: C, 77.41; H, 5.24; N, 14.11%. Expt.: C, 77.53; H, 5.33; N, 14.20%. HRMS (+ESI): *m/z* calculated for C<sub>64</sub>H<sub>52</sub>N<sub>10</sub>O<sub>2</sub>: 992.4275, found: 993.3209 [M+H]<sup>+</sup>.

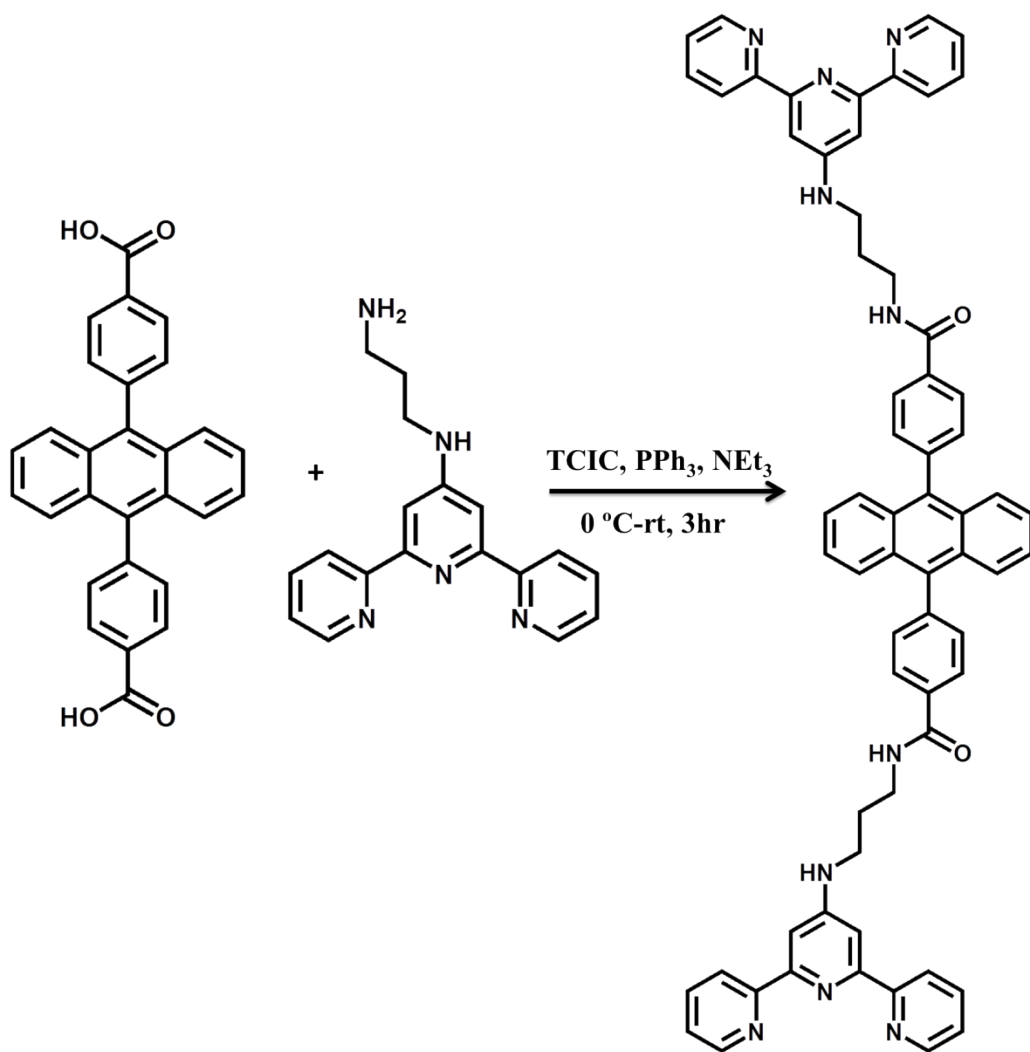

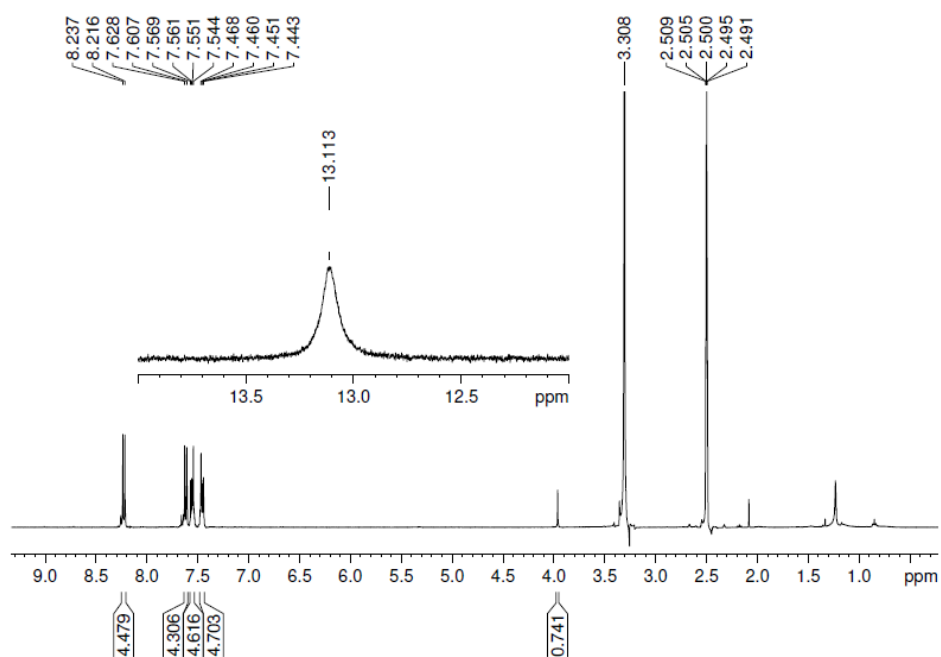

**Fig. S1**  $^1\text{H}$ -NMR spectra of 9,10-(4-carboxyphenyl)anthracene in  $\text{CDCl}_3$  solvent.

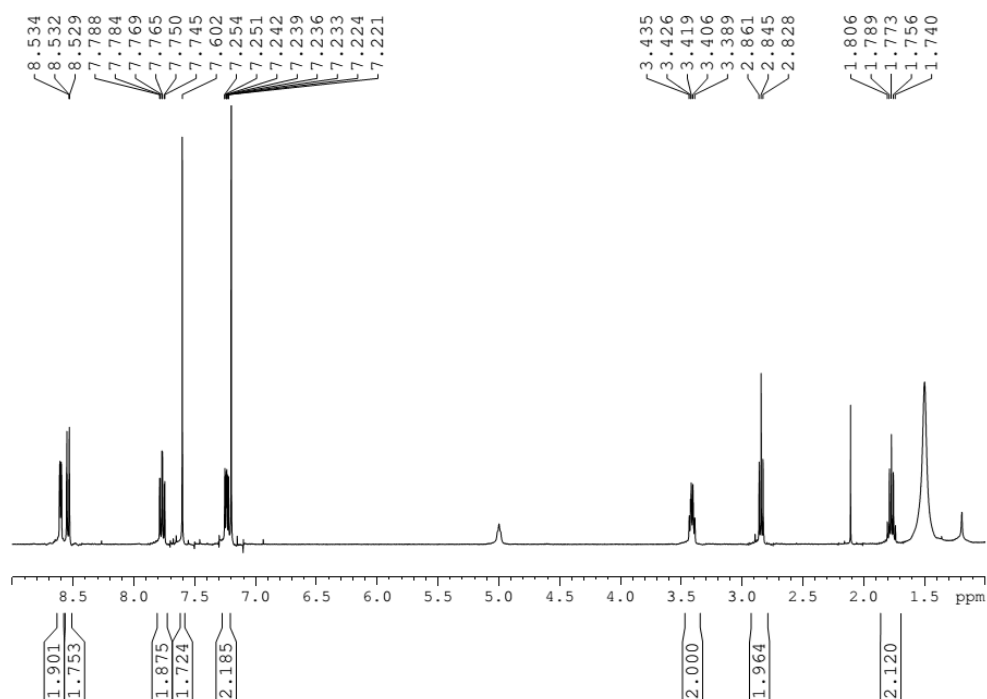

**Fig. S2**  $^1\text{H}$ -NMR spectra of 2,2';6',2''-terpyridin-4'-yl-propane-1,3-diamine in  $\text{CDCl}_3$  solvent.

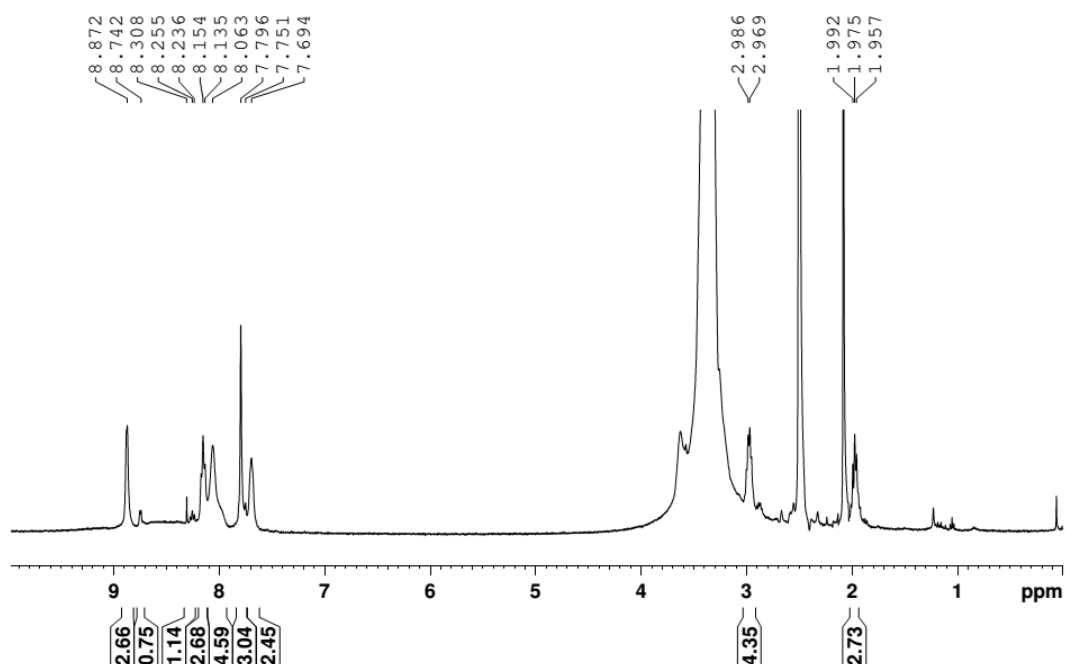

**Fig. S3**  $^1\text{H}$ -NMR spectra of **L** in  $\text{DMSO-}d^6$  solvent.

**1.5 Synthesis of ligand gel:**  $1 \times 10^{-3}$  M ligand solution in 1:1  $\text{CHCl}_3/\text{THF}$  mixture is heated at  $90^\circ\text{C}$  for few minutes to form a viscous liquid which on cooling results in opaque gel. The formation of gel is confirmed by inversion-test method. Selected IR data (KBr,  $\text{cm}^{-1}$ ): 3424 (m), 3233 (s), 2968- 2831 (s), 2722 (s), 1638 (s), 1583 (s), 1461 (s), 1376 (s), 1166 (m), 973 (m), 841 (s), 792 (s).

**1.6 Synthesis of coordination polymer gels (TbL and EuL):** Solution of **L** ( $1 \times 10^{-3}$  M) in  $\text{CHCl}_3/\text{THF}$  (1:1) is mixed with solution of  $\text{Tb}(\text{NO}_3)_3 \cdot 6\text{H}_2\text{O}$  or  $\text{Eu}(\text{NO}_3)_3 \cdot 6\text{H}_2\text{O}$  ( $1 \times 10^{-3}$  M, in THF) in 1:1 volumetric ratio. The mixture is heated at  $90^\circ\text{C}$  for 3 minutes to prepare a viscous solution which eventually results stable opaque gel upon cooling. Selected IR data (KBr,  $\text{cm}^{-1}$ ): For **TbL** xerogel : 3400 (b), 2964- 2916 (m), 1624 (s), 1479 (s), 1383 (s), 1263 (s), 1103- 1019 (s), 804 (s). For **EuL** xerogel: 3400 (b), 2976- 2836 (m), 1630 (m), 1464 (m), 1166 (m), 972 (m), 839 (m). CHN analysis : Calculated values for **TbL**: C, 58.33; H, 4.59; N,

12.28%. Found: C, 58.42; H, 4.67; N, 12.32%. Predicted formula:  $[\text{Tb}(\text{L})(\text{NO}_3)_3 \cdot 2\text{THF}]$ .  
Calculated values for **EuL**: C, 58.57; H, 4.61; N, 12.33%. Found: C, 58.62; H, 4.70; N, 12.29%. Predicted formula:  $[\text{Eu}(\text{L})(\text{NO}_3)_3 \cdot 2\text{THF}]$ .

**1.7 Synthesis of TbEu1 and TbEu2:** First ( $1 \times 10^{-3}$  M) and ( $1.2 \times 10^{-3}$  M) solutions of  $\text{Tb}(\text{NO}_3)_3 \cdot 6\text{H}_2\text{O}$  and  $\text{Eu}(\text{NO}_3)_3 \cdot 6\text{H}_2\text{O}$  are prepared by dissolving the metal salts in THF. After that 250  $\mu\text{l}$  solution of  $\text{Tb}(\text{NO}_3)_3 \cdot 6\text{H}_2\text{O}$  and 250  $\mu\text{l}$  solution of  $\text{Eu}(\text{NO}_3)_3 \cdot 6\text{H}_2\text{O}$  are added into 500  $\mu\text{l}$  solution of L ( $1 \times 10^{-3}$  M). The mixture is heated at 90 °C for few minutes to form viscous solution which is eventually converted to stable gel (**TbEu1**) after cooling. **TbEu2** is prepared in a similar way. First ( $1 \times 10^{-3}$  M) and ( $2 \times 10^{-3}$  M) solution of  $\text{Tb}(\text{NO}_3)_3 \cdot 6\text{H}_2\text{O}$  and  $\text{Eu}(\text{NO}_3)_3 \cdot 6\text{H}_2\text{O}$  are prepared in THF. After that 250  $\mu\text{l}$  solution of  $\text{Tb}(\text{NO}_3)_3 \cdot 6\text{H}_2\text{O}$  and 250  $\mu\text{l}$  solution of  $\text{Eu}(\text{NO}_3)_3 \cdot 6\text{H}_2\text{O}$  are added into 500  $\mu\text{l}$  solution of L ( $1 \times 10^{-3}$  M) and the mixture is heated at 90 °C for few minutes. The viscous solution formed is cooled and forms **TbEu2** coordination polymer gel. Selected FTIR data of **TbEu2** (KBr,  $\text{cm}^{-1}$ ): 3421 (b), 2948- 2829 (m), 1628 (s), 1460 (m), 1161 (m), 974-838 (m), 735 (m).



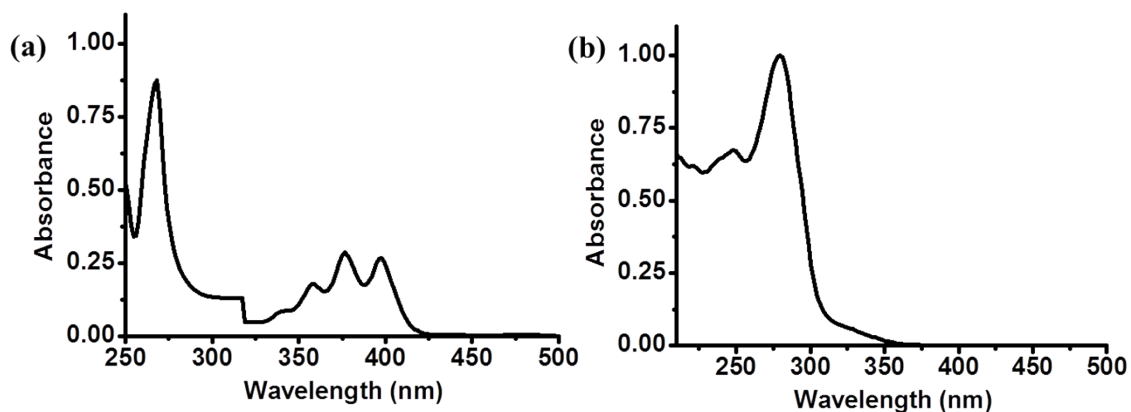

**Fig. S4** (a) Absorption spectra of 9,10-(4-carboxyphenyl)anthracene in DMSO and (b) absorption spectra of 2,2';6',2''-terpyridin-4'-yl-propane-1,3-diamine in MeOH.

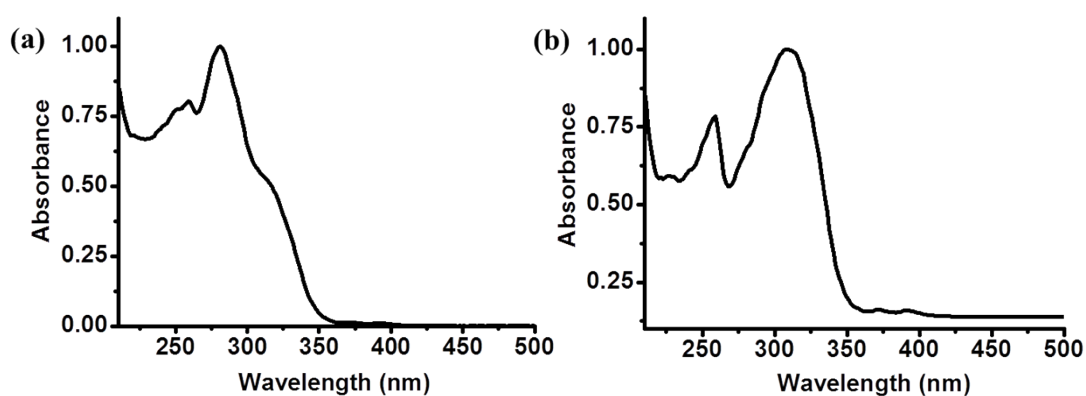

**Fig. S5** (a) Absorption spectra of **L** in MeOH and (b) Absorption spectra of **L** after subtracting the absorption spectra of 2,2';6',2''-terpyridin-4'-yl-propane-1,3-diamine which shows peak at 310 nm indicating  $\pi$ - $\pi^*$  transition of **ant** core.

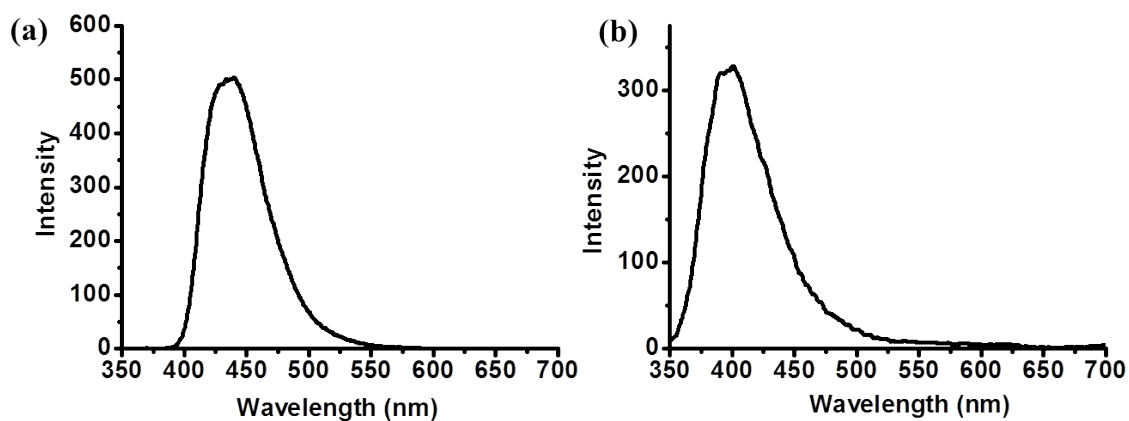

**Fig. S6** (a) Emission spectra of 9,10-(4-carboxyphenyl)anthracene in DMSO ( $10^{-4}$  M) and (b) 2,2';6',2''-terpyridin-4'-yl-propane-1,3-diamine in MeOH ( $10^{-4}$  M).

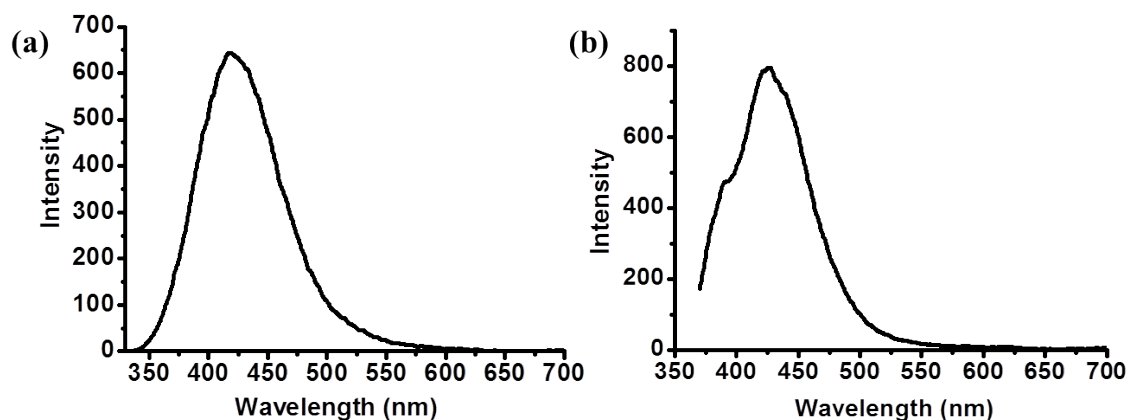

**Fig. S7** (a) Emission spectra of **L** in MeOH ( $10^{-4}$  M) and (b) Combined emission spectra of 9,10-(4-carboxyphenyl)anthracene and 2,2';6',2''-terpyridin-4'-yl-propane-1,3-diamine . This indicates emission is originating from both **ant** and **tpy**.

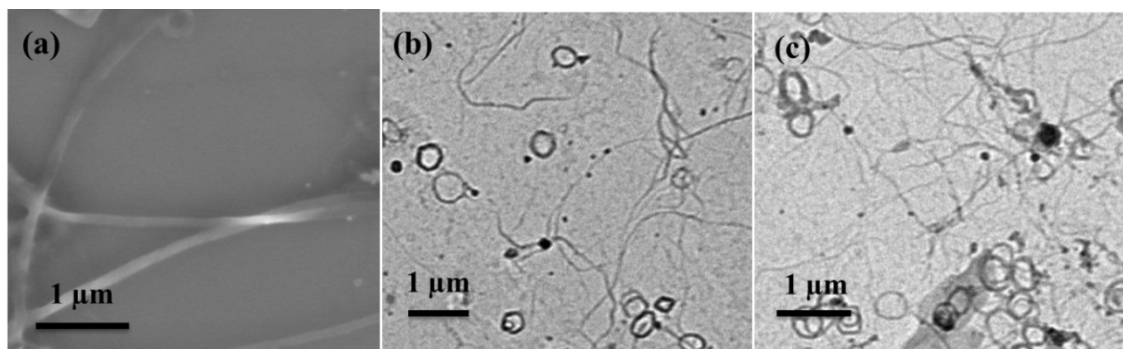

**Fig. S8** (a) FESEM image of **L** xerogel, (b) and (c) TEM images of **L** xerogel showing the presence of nanofibers and nanorings.

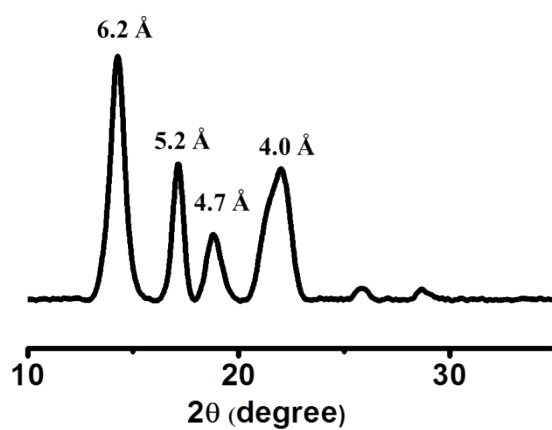

**Fig. S9** Powder X-ray diffraction pattern of **L** xerogel with corresponding  $d$ - spacing values.

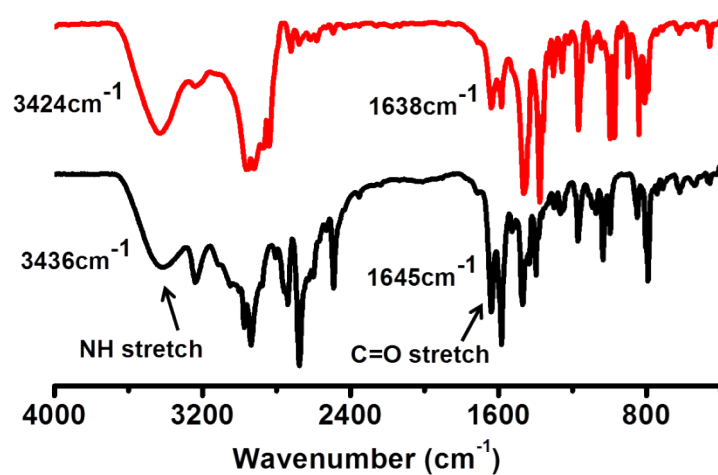

**Fig. S10** Comparison of FTIR of **L** (black) and **L** xerogel (red).

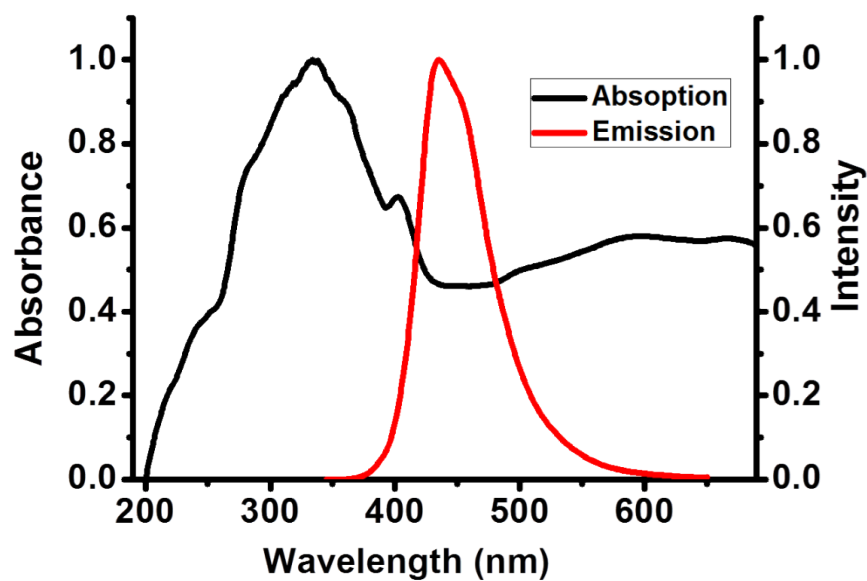

**Fig. S11** Solid state absorption (black) and emission (red) spectra of **L** xerogel.

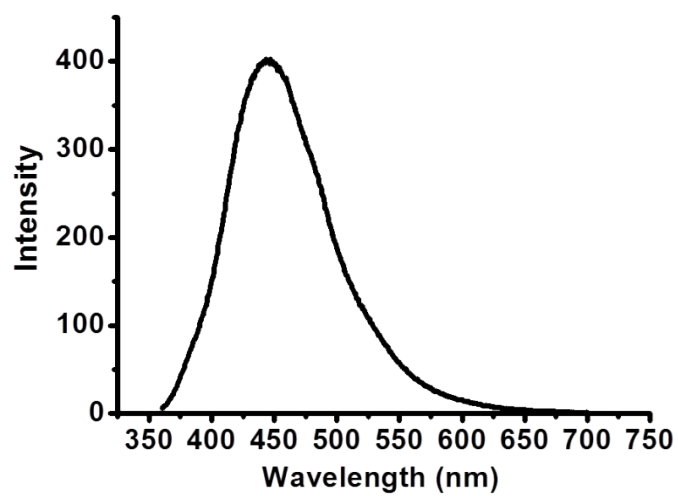

**Fig. S12** Emission spectra of L gel coated quartz substrate.

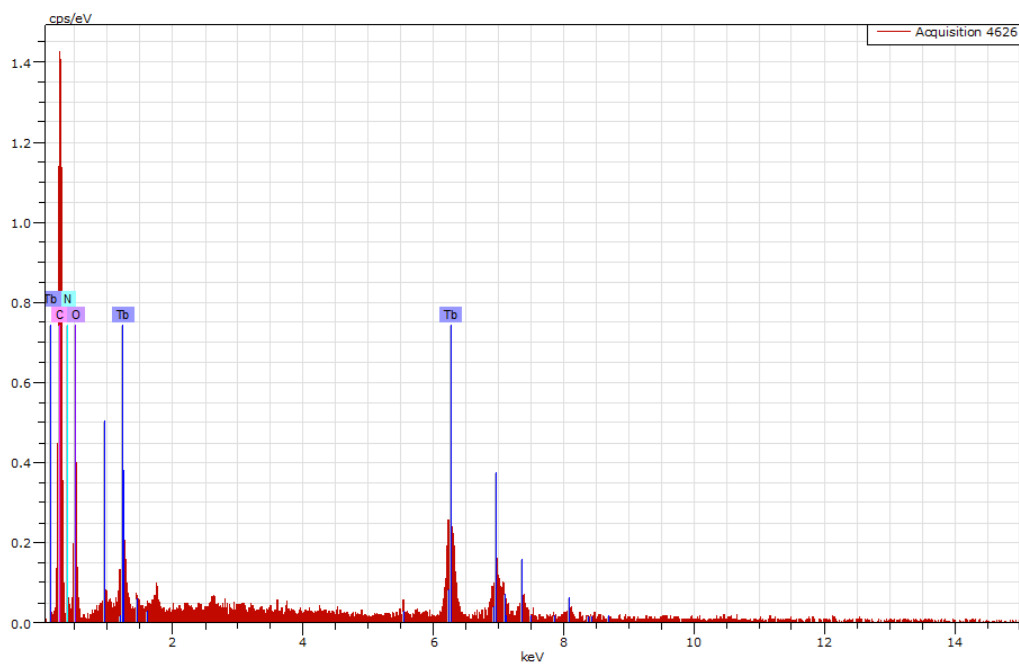

**Fig. S13** EDXS of TbL showing the presence of Tb<sup>III</sup> in xerogel.

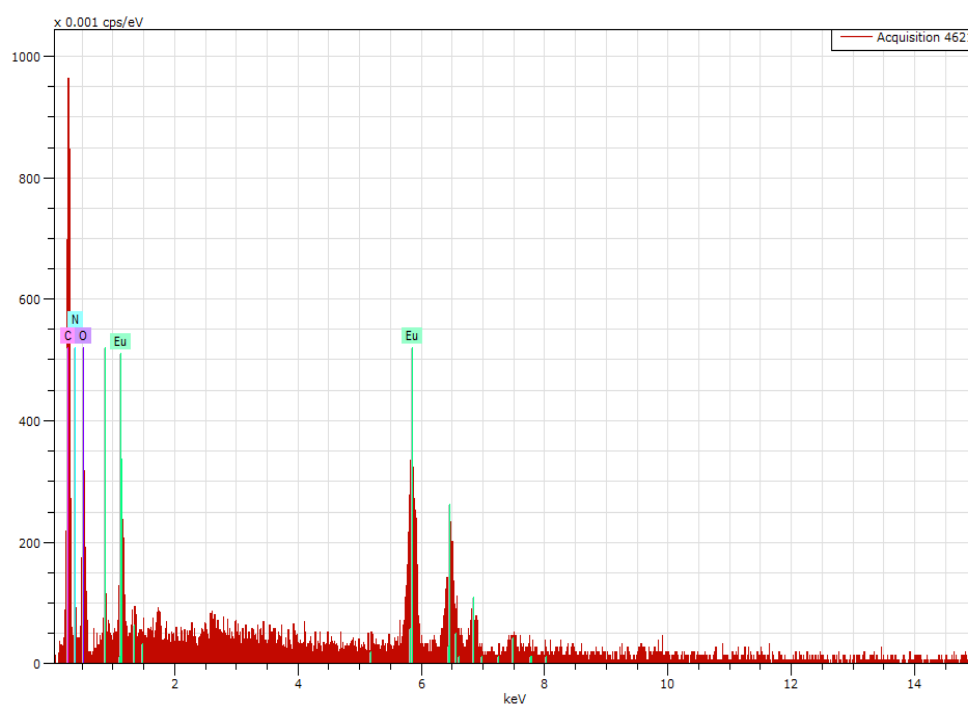

**Fig. S14** EDXS of **EuL** showing the presence of  $\text{Eu}^{\text{III}}$  in xerogel.

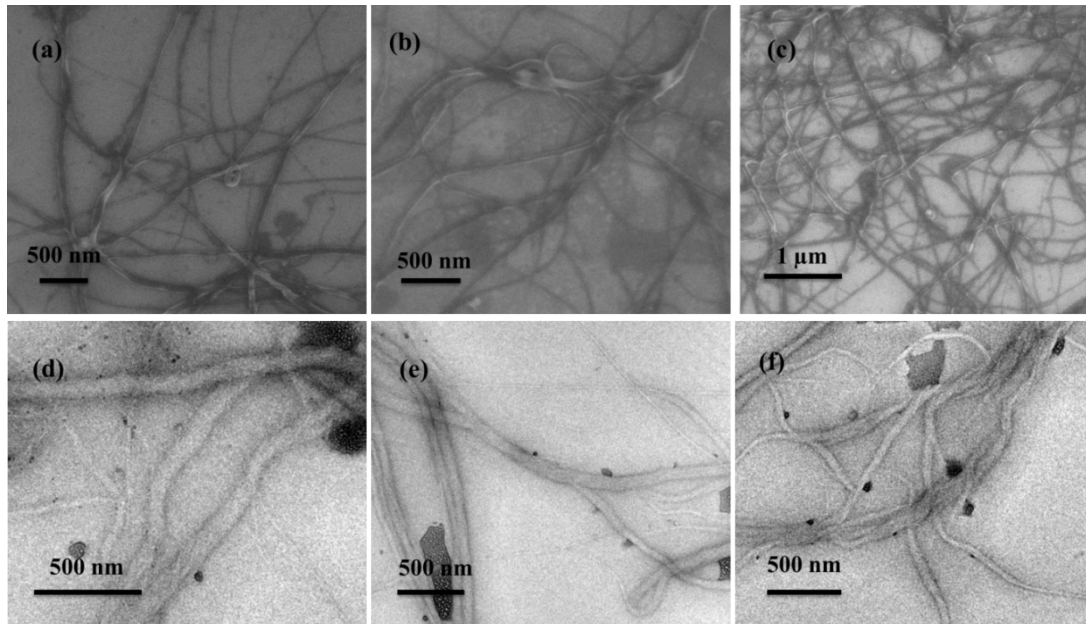

**Fig. S15** (a), (b), (c) FESEM images of **TbL** xerogel and (d), (e), (f) TEM images of **TbL** xerogel showing the presence of coiled-nanofiber morphology.

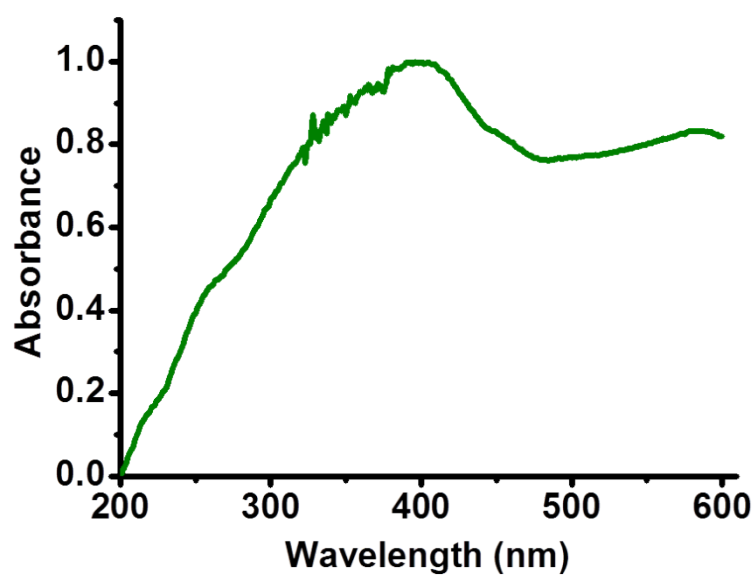

Fig. S16 Solid state absorption spectra of **TbL** xerogel.

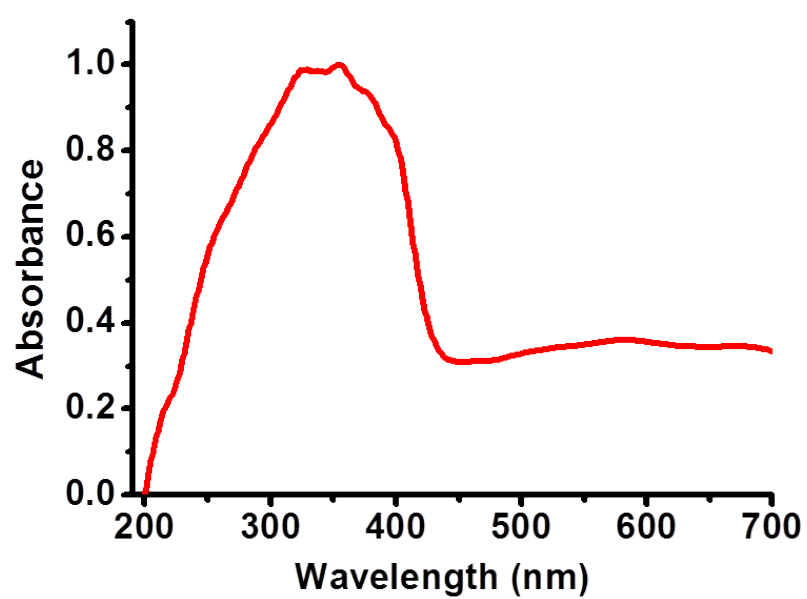

Fig. S17 Solid state absorption spectra of **EuL** xerogel.

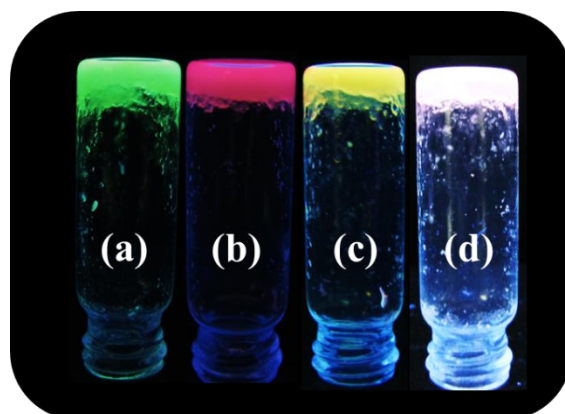

**Fig. S18** Photograph of (a) **TbL**, (b) **EuL**, (c) **TbEu1** and (d) **TbEu2** gels under UV light showing green, pink, yellow and white emission respectively.

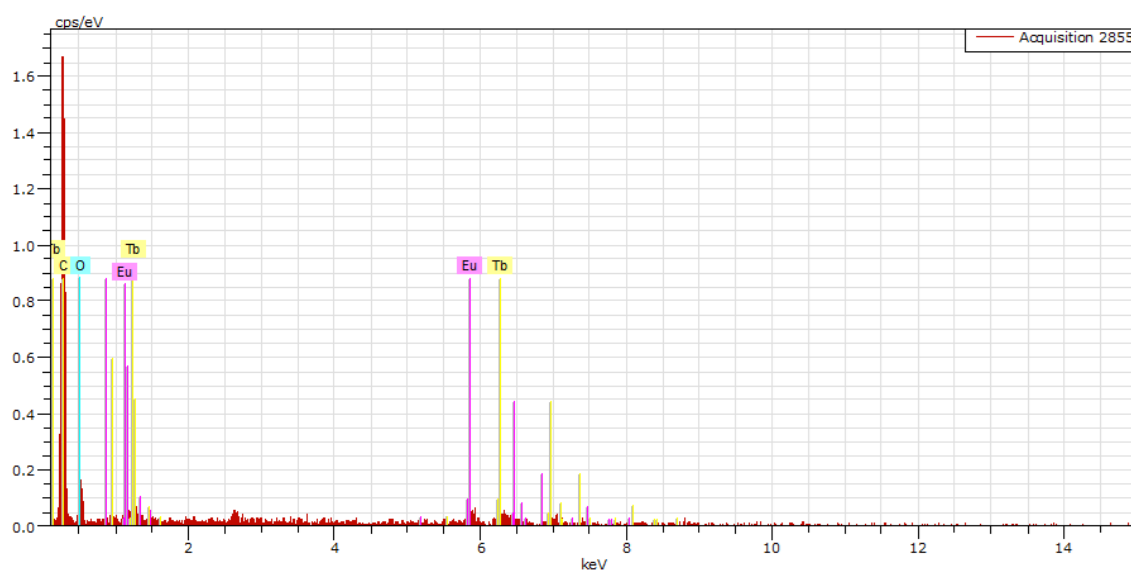

**Fig. S19** EDXS of **TbEu2** showing the presence of both  $\text{Tb}^{\text{III}}$  and  $\text{Eu}^{\text{III}}$  in xerogel.



## References:

1. (a) S. Ma, D. Sun, P. M. Forster, D. Yuan, W. Zhuang, Y.-S. Chen, J. B. Parise and H.-C. Zhou, *Inorg. Chem.*, 2009, **48**, 4616-4618; (b) D. Shi, Y. Ren, H. Jiang, J. Lu and X. Cheng, *Dalton Trans.*, 2013, **42**, 484-491.
2. O. Kotova, R. Daly, C. M. G. dos Santos, M. Boese, P. E. Kruger, J. J. Boland and T. Gunnlaugsson, *Angew. Chem. Int. Ed.*, 2012, **51**, 7208-7212.
